# Supplementary material for: Agricultural Sciences in the Big Data Era: Genotype and Phenotype Data Standardization, Utilization and Integration
Source: Preprints.org preprint supplement (doi:10.20944/preprints202306.1013.v1), 2023-06-14
Supplement: Supplementary file 1 [file supplementary]

## Sheet: Suppl. Table 1
Supplementary Table 1. Metadata description.
Database	Description	Link for metadata	Note
NCBI	NCBI provides BioSample metadata templates.based on organism linearage validation	(https://www.ncbi.nlm.nih.gov/biosample/docs/submission/validation/)	INSDC standard metadata is required for project, sample, and sequence library
DRA	DRA explains metadata requirements in detail for six object types: Data Submission, BioProject, BioSample, Experiment, Run, and Analysis.	https://www.ddbj.nig.ac.jp/dra/metadata-e.html	INSDC standard
ENA	ENA provides Sample checklists including Genomic Standards Consortium (GSC) package extension for reporting plant measurements and observations	https://www.ebi.ac.uk/ena/browser/view/ERC000020	INSDC standard
GSA	GSA is INSDC compatible. Metadata is required for BioProject, BioSample, Experiment, and Run.	https://ngdc.cncb.ac.cn/gsa/document/start_here.jsp#handbook	GSA provides tutorials, detailed descriptions, and quickstart guides about metadata in Chinese and English.
IBDC	INDA at IBDC is INSDC compatible. Data submitted to INDA is automatically synchronized to NCBI/DBA/ENA	https://inda.rcb.ac.in/home	INDA provides overview of data submission workflow
AGDR	Metadata are defined for administrative entities (program, project, experiment, publication, indigenous governance, etc.), Biospecimen, BioSample, and data file.	https://repo.data.nesi.org.nz/DD	The AGDR follows the principles of Māori Data Sovereignty. Metadata templates can be downloaded as Json or TSV files.
DRYAD	Minimum metadata required includes journal name, title of the study, authors, abstract about the dataset structure and concepts, and research domain.	https://datadryad.org/stash/submission_process#upload-methods	It is suggested file sizes not exceed 10GB for efficient upload/download, with a maximum of 300GB per data submission made through the web interface.
Zenodo	Metadata is compliant with the minimum and recommended terms in DataCite's Metadata Schema. Data is versioned and a DOI will be created/registered after the submitter publishes the dataset.'	https://zenodo.org/	As a part of OpenAIRE (Open Access Infrastructure for Research in Europe), Zenodo is hosted at the Data Center at the European Organization for Nuclear Research (CERN), an Intergovernmental Organization (IGO). Data protection complies with CERN’s Operational Circular 11 (OC11).
Figshare	Metadata is recommended for the study (title, research category, item type, description, keywords, funding, resource title/DOI, references, research institutions, contact email), in particular a license type for data reuse.	https://help.figshare.com/article/guide-to-sharing-data-on-figshare-plus	Data quota for free usage of figshare is 20GB, with 20GB file size restriction and a 100 project cap. With the commercial version of Figshare+, users can upload files greater than 20GB and the storage allowance is up to TB.

## Sheet: Suppl. Table 2
Supplementary Table 2. A list of sequence specific data resources.
Database	Description	Note	Current release	Link	Reference
PlantProm	Database of plant promoters.	Current release (2016.03) contains verified transcription start sites (TSS) from 576 plant promoter regions.	2016	http://www.softberry.com/berry.phtml?topic=plantp_2016.03&subgroup=plantprom&group=data&no_menu=on	Shahmuradov IA, Gammerman AJ, Hancock JM, Bramley PM, Solovyev VV (2003) PlantProm: a database of plant promoter sequences. Nucleic Acids Res., 31: 114-117 (PMID: 12519961).
Ppdb	Plant proteome database (Ppdb)	Arabidopsis and maize	2004	http://ppdb.tc.cornell.edu/	Joint project between Klaas J. van Wijk Lab of Cornell University and the Computational Biology Service Unit of Cornell Life Sciences Core Laboratories Center.
PlantPan	Plant transcription factors (TF)	PlantPAN 3.0 contains 17,230 TF and 4,703 matrices of TF binding sites among 78 plant species.	2019	http://plantpan.itps.ncku.edu.tw/	Chow, C. N., Lee, T. Y., Hung, Y. C., Li, G. Z., Tseng, K. C., Liu, Y. H., ... & Chang, W. C. (2019). PlantPAN3. 0: a new and updated resource for reconstructing transcriptional regulatory networks from ChIP-seq experiments in plants. Nucleic acids research, 47(D1), D1155-D1163.
PlantCare	Plant TF database.	PlantCARE contains 435 plant transcription sites from 149 monocots, 281 dicots and 5 other plants. It is free to use for academic users.		http://bioinformatics.psb.ugent.be/webtools/plantcare/html/	Lescot, M., Déhais, P., Thijs, G., Marchal, K., Moreau, Y., Van de Peer, Y., ... & Rombauts, S. (2002). PlantCARE, a database of plant cis-acting regulatory elements and a portal to tools for in silico analysis of promoter sequences. Nucleic acids research, 30(1), 325-327.
Rfam	A database of RNA sequence families of structural RNAs.	New families with functional classification and supporting evidence for a secondary structure can be submitted by email.	2022	https://rfam.org/submit_alignment	S. Griffiths-Jones, A. Bateman, M. Marshall, A. Khanna and S.R. Eddy Nucleic Acids Research (2003) 31(1):p439-441 S. Griffiths-Jones, S. Moxon, M. Marshall, A. Khanna, S.R. Eddy, A. Bateman Nucleic Acids Research (2005) Database Issue 33:D121-D124
miRBase	A database of miRNA.	Recommended submitting new hairpin and novel miRNAs through mirbase@manchester.ac.uk	2019	https://www.mirbase.org/	miRBase: from microRNA sequences to function. Kozomara A, Birgaoanu M, Griffiths-Jones S. Nucleic Acids Res 2019 47:D155-D162 miRBase: integrating microRNA annotation and deep-sequencing data. Kozomara A, Griffiths-Jones S. Nucleic Acids Res 2011 39:D152-D157 miRBase: tools for microRNA genomics. Griffiths-Jones S, Saini HK, van Dongen S, Enright AJ. Nucleic Acids Res 2008 36:D154-D158
RNAcentral	The non-coding RNA (ncRNA) sequence collection	Formed from 57 Expert Databases, eveloped by EBI and supported by Wellcome Charity fund and BBSRC (Biotechnology and Biological Sciences Research Council in UK).	2023	https://rnacentral.org/	"RNAcentral: a comprehensive database of non-coding RNA sequences." Nucleic acids research 45, no. D1 (2017): D128-D134. "RNAcentral: a hub of information for non-coding RNA sequences." Nucleic Acids Research 47, no. D1 (2019): D221-D229. "RNAcentral 2021: secondary structure integration, improved sequence search and new member databases." Nucleic acids research 49, no. D1 (2021): D212-D220.
PlantGDB	Plant Genomics Database.	Originally NSF-funded (IOS-1221984). Grant ended in 2015. With protein, expressed sequence tag (EST), genomics, cDNA, mRNA and other sequences collected from multiple plant genus.	2015	https://www.plantgdb.org/	Dong, Q., Schlueter, S.D. & Brendel, V. (2004) PlantGDB, plant genome database and analysis tools. Nucl. Acids Res. 32, D354-D359. [PubMed ID: 14681433 A comprehensive publications are listed at https://www.plantgdb.org/site/publications.php
DeepBlue	Epigenetic data	EWAS Data Hubcatalog; EWASdb; EWAS atlas		https://deepblue.mpi-inf.mpg.de/deepblue_overview.php	Albrecht,F., List,M., Bock,C. and Lengauer,T. (2016) DeepBlue epigenomic data server: programmatic data retrieval and analysis of epigenome region sets. Nucleic Acids Research, doi:10.1093/nar/gkw211
Plant Regulomics Portal (PRP)	DNA methylation, non-coding RNA, histone modification data for Arabidopsis thaliana, soyabean, rice and maize	PRP integrates curated published data from various datatypes: sequencing data (RNA, methylome, sRNA, miRNA), histones, repeats, gene expression and pathways, etc.	*	https://scbb.ihbt.res.in/PRP	Panzade, G., Gangwar, I., Awasthi, S., Sharma, N., & Shankar, R. (2019). Plant Regulomics Portal (PRP): A comprehensive integrated regulatory information and analysis portal for plant genomes. Database, 2019.
CoGE	Comparative Genomics	Online tool for homologous genomics study. Allow adding new genomes for comparative genomics study.	2023	https://genomevolution.org/coge/	Lyons, E., & Freeling, M. (2008). How to usefully compare homologous plant genes and chromosomes as DNA sequences. The Plant Journal, 53(4), 661-673. https://genomevolution.org/wiki/index.php/Contact_Page#How_to_cite_CoGe.3F
GreenPhylDB v5	Pangenome	The version 5.1 contains now a catalogue of clusters / gene families combining 19 pangenomes (e.g. rice, maize, banana, grape, cacao) and 27 reference genomes for a total of 46 species	2021	https://www.greenphyl.org/	Conte, M. G., Gaillard, S., Lanau, N., Rouard, M., & Périn, C. (2007). GreenPhylDB: a database for plant comparative genomics. Nucleic acids research, 36(suppl_1), D991-D998. Conte, M., Laporte, M. A., Périn, C., & Rouard, M. (2009). GreenPhylDB: A gene family database for plant functional genomics. Nature Precedings, 1-1. Guignon, V., Toure, A., Droc, G., Dufayard, J. F., Conte, M., & Rouard, M.…
* Unknown: No database release or update information is described at the website.

## Sheet: Suppl. Table 3
Supplementary Table 3 . A list of public crop community databases with data types, metadata, submission format, and URL for data submission
Species/Crop	Database	Database URL	Data types that can be submitted	Metadata summary	Submission Format	URL for list of meta data/data submission files/online form
Arabidopsis	TAIR	https://www.arabidopsis.org/	gene function annotation	author (ORCID), GO, evidence code	online submission system (GOAT)	https://goat.phoenixbioinformatics.org/
			gene family		XLS	https://www.arabidopsis.org/submit/genefamily_submission.jsp
			pathway		XLS	https://www.arabidopsis.org/submit/pathway_submission.jsp
			mutant phenotype		XLS, tab delimited text file	https://www.arabidopsis.org/submit/phenotype_submission.jsp
			marker/allele		XLS	https://www.arabidopsis.org/submit/marker_submission.jsp
Cassava	CassavaBase	https://www.cassavabase.org/	accession metadata	uniquename, synonyms, species, + user configurable attributes	XLSX	https://cassavabase.org/breeders/upload
			seedlots	uniquename, storage location, assay information	XLSX	https://cassavabase.org/breeders/upload
			pedigree data	female parent, male parent, type	CSV	https://cassavabase.org/breeders/upload
			field layouts	plot ids, accession, field coords, replicate, etc.	XLSX	https://cassavabase.org/breeders/upload
			phenotyping data	observation unit id, trait, trait value, operator, timestamp	XLSX, fieldbook app	https://cassavabase.org/breeders/upload
			genotyping plate data	source observation unit id, plate coords, operator, timestamp	XLSX, coordinate app	https://cassavabase.org/breeders/upload
			genotyping data	VCF file metadata	XLSX (InterTek format), VCF	https://cassavabase.org/breeders/upload
			locations	location name, county, country, geojson, type, etc.	XLSX	https://cassavabase.org/breeders/upload
			crossing data	#pollinations, #seeds, #fruit, etc. location, operator, timestamp	XLSX, Intercross, btract	https://cassavabase.org/breeders/upload
			analysis results	analysis model, algorithm, input data, results	XLSX	https://cassavabase.org/breeders/upload
Citrus	Citrus Genome Database	https://www.citrusgenomedb.org/	whole genome sequence and annotation	species, cultivar/accession, software, materials/methods, publication	GFF, FASTA, TXT	https://www.citrusgenomedb.org/tgg/data_submission
			marker/allele	species/germplasm, polymorphism type, genome/genetic position	XLS	https://www.citrusgenomedb.org/tgg/data_submission
			genetic maps	experiments, germplasm, marker	XLS	https://www.citrusgenomedb.org/tgg/data_submission
			QTL	experiments, markers, germplasm, phenotype ontology terms, statistical values	XLS	https://www.citrusgenomedb.org/tgg/data_submission
Citrus / Diaphorina citri / Ca. Liberibacter asiaticus	Citrus Greening	https://www.citrusgreening.org/	accession metadata	uniquename, synonyms, species, + user configurable attributes	XLSX	https://citrusgreening.org/breeders/upload
			seedlots	uniquename, storage location, assay information	XLSX	https://citrusgreening.org/breeders/upload
			pedigree data	female parent, male parent, type	CSV	https://citrusgreening.org/breeders/upload
			field layouts	plot ids, accession, field coords, replicate, etc.	XLSX	https://citrusgreening.org/breeders/upload
			phenotyping data	observation unit id, trait, trait value, operator, timestamp	XLSX, fieldbook app	https://citrusgreening.org/breeders/upload
			genotyping plate data	source observation unit id, plate coords, operator, timestamp	XLSX, coordinate app	https://citrusgreening.org/breeders/upload
			genotyping data	VCF file metadata	XLSX (InterTek format), VCF	https://citrusgreening.org/breeders/upload
			locations	location name, county, country, geojson, type, etc.	XLSX	https://citrusgreening.org/breeders/upload
			crossing data	#pollinations, #seeds, #fruit, etc. location, operator, timestamp	XLSX, Intercross, btract	https://citrusgreening.org/breeders/upload
			analysis results	analysis model, algorithm, input data, results	XLSX	https://citrusgreening.org/breeders/upload
Cotton	CottonGen	https://www.cottongen.org/	whole genome sequence and annotation	species, cultivar/accession, software, materials/methods, publication	GFF, FASTA, TXT	https://www.cottongen.org/data/submission
			gene function annotation	author (ORCID), GO, evidence code	XLS	https://www.cottongen.org/data/submission
			genotype evaluation data	experiments, markers, germplasm, marker genome position	XLS, VCF	https://www.cottongen.org/data/submission
			mutant phenotype/image	trait locus name, species	XLS, image file	https://www.cottongen.org/data/submission
			marker/allele	species/germplasm, polymorphism type, genome/genetic position	XLS	https://www.cottongen.org/data/submission
			genetic maps	experiments, germplasm, marker	XLS	https://www.cottongen.org/data/submission
			QTL	experiments, markers, germplasm, phenotype ontology terms, statistical values	XLS	https://www.cottongen.org/data/submission
			GWAS	experiments, markers, germplasm, phenotype ontology terms, statistical values	XLS
			phenotype evaluation	experiments, germplasm, phenotype ontology terms, environment	XLS
Cucurbit	Cucurbit Genomics	http://cucurbitgenomics.org/
Forest trees	TreeGenes	https://treegenesdb.org	whole genome sequence and annotation	species, cultivar/accession, software, materials/methods, publication
			genotype evaluation data	experiments, markers, marker genome position
			marker/allele	species, polymorphism type, genome/genetic position
			genetic maps	experiments, marker
			phenotype evaluation	experiments, phenotype ontology terms, environment
	Hardwood Genomics	http://www.hardwoodgenomics.org/
Grains	GrainGenes	https://wheat.pw.usda.gov	whole genome sequence and annotation
			marker/allele	species/germplasm, polymorphism type, genome/genetic position	XLS	https://wheat.pw.usda.gov/GG3/submit_to_graingenes
			genetic maps	experiments, germplasm, marker	XLS	https://wheat.pw.usda.gov/GG3/submit_to_graingenes
			QTL	experiments, markers, germplasm, phenotype ontology terms, statistical values	XLS	https://wheat.pw.usda.gov/GG3/submit_to_graingenes
	Gramene	https://www.gramene.org/	Whole genome sequence and annotation from Ensembl Plants		FASTA, GFF, GTF
			Variation from Ensembl Plants		VCF
			Whole gene alignments and protein gene tree analysis from Ensembl Compara
			Comparative genomics - Orthologs, paralogs from Ensembl Compara tree
			Gene expression from EBI expression atlas
			Ontology from Planteome
			Pathways from Gramene's Plant Reactome
	SorghumBase	https://www.sorghumbase.org/	Whole genome sequence and annotation from Ensembl Plants and Phytozome		FASTA
			Genetic Variation - SNPS, EMS induced mutations		VCF
			Phenotypic variation - QTLs		Sorghum QTL Atlas
			Gene Expression from EBI Expression Atlas
			Pathways from Gramene's Plant Reactome
			Comparative genomics - Orthologs, paralogs from Ensembl Compara tree
	Triticeae toolbox, T3	https://wheat.triticeaetoolbox.org/
	WheatIS	https://wheatis.org	WheatIS pulls information about indexed data from other sites
	KitBase	http://kitbase.ucdavis.edu/	whole-genome sequenced fast-neutron-induced mutant population information
			Phenotype information
Legumes	KnowPulse	https://knowpulse.usask.ca/
	Legume Information System	https://www.legumeinfo.org/	whole genome sequence and annotation
			marker/allele
			genetic maps
			QTL	experiments, markers, germplasm, phenotype ontology terms, statistical values	XLS
			GWAS	experiments, markers, germplasm, phenotype ontology terms, statistical values	XLS
	PeanutBase	https://peanutbase.org
Pulses	Pulse Crop Database	https://www.pulsedb.org/	whole genome sequence and annotation	species, cultivar/accession, software, materials/methods, publication	GFF, FASTA, TXT	https://www.pulsedb.org/data_submission
			marker/allele	species/germplasm, polymorphism type, genome/genetic position	XLS	https://www.pulsedb.org/data_submission
			genetic maps	experiments, germplasm, marker	XLS	https://www.pulsedb.org/data_submission
			QTL	experiments, markers, germplasm, phenotype ontology terms, statistical values	XLS	https://www.pulsedb.org/data_submission
	Soybase	https://www.soybase.org/
Maize	MaizeGDB	https://maizegdb.org/	whole genome sequence and annotation	species, cultivar/accession, software, materials/methods, publication, statistics	FASTA, GFF, txt	https://www.maizegdb.org/contribute_data
			gene function annotation	reference, ontology, description, evidence code	txt, XLSX
			genotype	experiments, position, germplasm, marker genome position	VCF
			mutant phenotype/image	phenotype, description, image	PNG, JPEG
			marker/allele	marker, position	XLSX
			genetic maps	marker, position	XLSX
			QTL	experiments, markers, germplasm, phenotype, statistical values, positions	XLSX
			GWAS	experiments, markers, germplasm, phenotype, statistical values, positions	XLSX,GFF,BED
			Gene Expression	reference, alignements, conditions	BAM.SAM
			Comparative genomics - Orthologs, paralogs	reference, gene models id, confidence	GFF,BED, XLSX
			protein structures	reference, PDB, CIF, confidence scores	PDB, CIF
			Epigenomic, DNA-binding, and gene regulation	GFF, BED, reference	GFF,BED
			Genomic features	GFF, BED, reference	GFF,BED
			Insertion data	Stock, position, variation	GFF,BED, XLSX
Musa	MusaBase	https://www.musabase.org/		see Cassavabase
Rosaceae	Genome Database for Rosaceae	https://www.rosaceae.org/	whole genome sequence and annotation	species, cultivar/accession, software, materials/methods, publication	GFF, FASTA, TXT	https://www.rosaceae.org/data/submission/genome
			gene function annotation	author (ORCID), GO, evidence code	XLS	https://www.rosaceae.org/data/submission
			gene expression	NCBI BioProject and BioSample IDs	TXT	https://www.rosaceae.org/data/submission/expression
			genotype evaluation data	experiments, markers, germplasm, marker genome position	XLS, VCF	https://www.rosaceae.org/data/submission
			marker/allele	species/germplasm, polymorphism type, genome/genetic position	XLS	https://www.rosaceae.org/data/submission
			genetic maps	experiments, germplasm, marker	XLS	https://www.rosaceae.org/data/submission
			QTL	experiments, markers, germplasm, phenotype ontology terms, statistical values	XLS	https://www.rosaceae.org/data/submission
			GWAS	experiments, markers, germplasm, phenotype ontology terms, statistical values	XLS	https://www.rosaceae.org/data/submission
			phenotype evaluation	experiments, germplasm, phenotype ontology terms, environment	XLS	https://www.rosaceae.org/data/submission
Solanaceae	Sol Genomics	https://solgenomics.net/		See Cassavabase
Sweet Potato	SweetPotatoBase	https://www.sweetpotatobase.org/		See Cassavabase
Vaccinium	Genome Database for Vaccinium	https://www.vaccinium.org/	whole genome sequence and annotation	species, cultivar/accession, software, materials/methods, publication	GFF, FASTA, TXT	https://www.vaccinium.org/data_submission
			marker/allele	species/germplasm, polymorphism type, genome/genetic position	XLS	https://www.vaccinium.org/data_submission
			genetic maps	experiments, germplasm, marker	XLS	https://www.vaccinium.org/data_submission
			QTL	experiments, markers, germplasm, phenotype ontology terms, statistical values	XLS	https://www.vaccinium.org/data_submission
Yam	YamBase	https://www.yambase.org/		See Cassavabase
Others	AgBase	https://agbase.arizona.edu/
Arabidopsis and Others	Bio-Analytic Resource	https://bar.utoronto.ca/	whole genome sequence and annotation, CDS	Pubmed ID, DOI	text, FASTA, GFF	please contact nicholas.provart@utoronto.ca - we typically work
(maize, soybean, poplar, tomato, potato, M. truncatula, peanut, Cannabis and others)			gene function annotation	Pubmed ID, DOI	text, csv	collaboratively to develop new eFP Browsers or ePlants
			gene expression (most of our data are gene expression data)	Pubmed ID, DOI, experiment summary	csv
			protein-protein and protein-DNA interactions	Pubmed ID, DOI, MI terms	csv
			protein structures	Pubmed ID, DOI	pdb
			single nucleotide polymorphisms	Pubmed ID, DOI	vcf
